# Supplementary material
Source: PubMed Central journal article supplement (PMC5870071)
Supplement: Supp_Fig1.pdf [file Supp_Fig1.pdf]

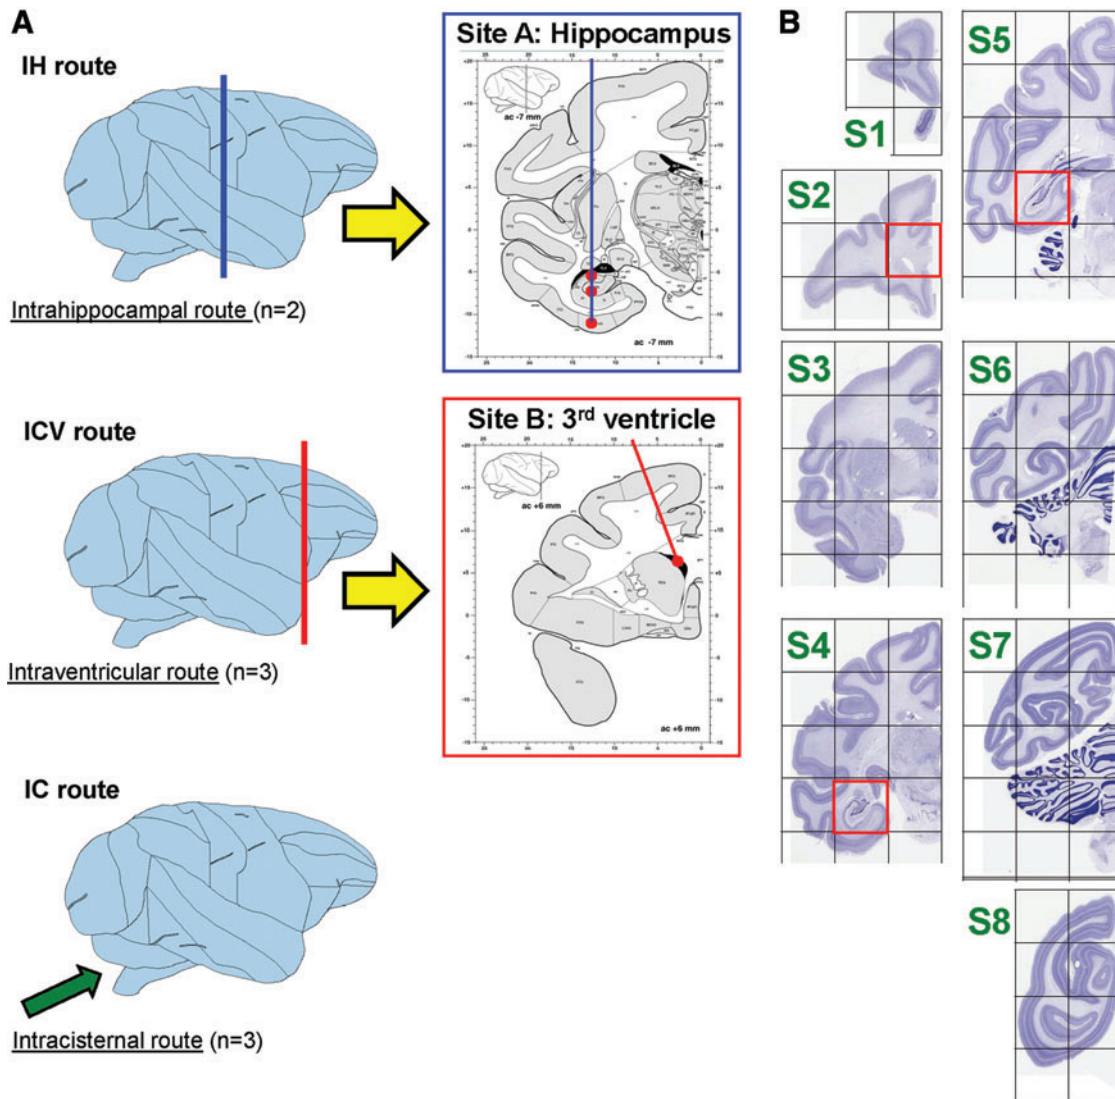

**Supplementary Figure S1.** Schematic of the three different routes of delivery and sectioning of the brain for analysis. **(A)** Sites of AAVrh.10APOE2-HA vector administration in NHP CNS. Three routes of administration were assessed in this study: (1) intrahippocampal route (IH), directly to hippocampal region, bilaterally; (2) intraventricular route (ICV), in the frontal third ventricle, unilaterally; and (3) intracisternal route (IC), into the cisterna magna, unilaterally. Site A (*blue line*) corresponds to deposits in the primate temporal lobe (at three depths: into hippocampus CA1, dentate gyrus, and entorhinal cortex). Site B (*red line*) corresponds to a single bolus deposit in the frontal lobe lateral ventricle (third). Site C (*green arrow*) corresponds to a single bolus deposit in the cisterna magna CSF reservoir at the posterior to the hindbrain. The *red dots* on the schematic brain drawings indicate the approximate site of the vector deposits inside the brain. **(B)** Schematic of brain cubes sectioning during necropsy and the approximate locations of brain substructures for each cube in the eight coronal sections (S1–S8). *Red squares* highlight regions of interest for study: lateral ventricle (S2) and hippocampus (S4 and S5). Brain images shown in **(B)** are Nissl stained coronal brain sections from a Rhesus macaque from brainsmap.org as a guide for substructure identification.
