# Supplementary material
Source: PubMed Central journal article supplement (PMC5870071)
Supplement: Supp_Fig2.pdf [file Supp_Fig2.pdf]

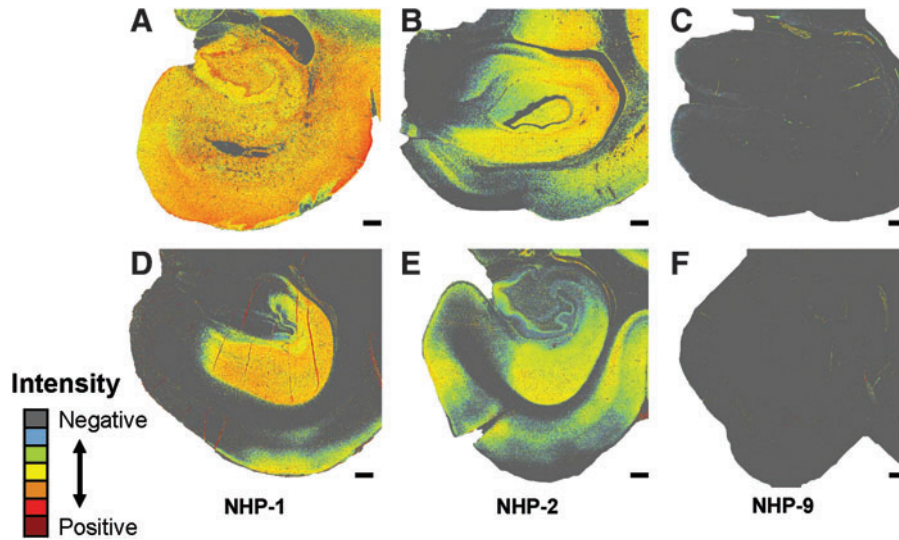

**Supplementary Figure S2.** Expression of APOE2-HA following intrahippocampal delivery of AAVrh.10hAPOE2-HA. Sections of the hippocampus are shown following vector delivery to the intrahippocampal route of NHP-1 and NHP-2 and the non-treated control, NHP-9. Serial coronal sections were stained with anti-HA antibodies and IHC to detect expressed ApoE2-HA proteins. In order to compare the entire hippocampus and entorhinal/perirhinal cortex area of the medial temporal lobe, the IHC stained slides were converted to a digital heat map using ImageJ to demonstrate the intensity of the ApoE2-HA deposits. *Gray*, background; *orange/red*, expression of human ApoE2-HA (see color intensity chart). Examples from NHP-1, -2, and -9 include rostral (**A**, **B**, vector; **C**, control) and caudal (**D**, **E**, vector; **F**, control) sections. ApoE2 expression is seen throughout the dentate gyrus, hippocampus CA1/CA3, and entorhinal cortex. Scale bar = 200  $\mu$ m.
