# Supplementary material
Source: PubMed Central journal article supplement (PMC5870071)
Supplement: Supp_Fig6.pdf [file Supp_Fig6.pdf]

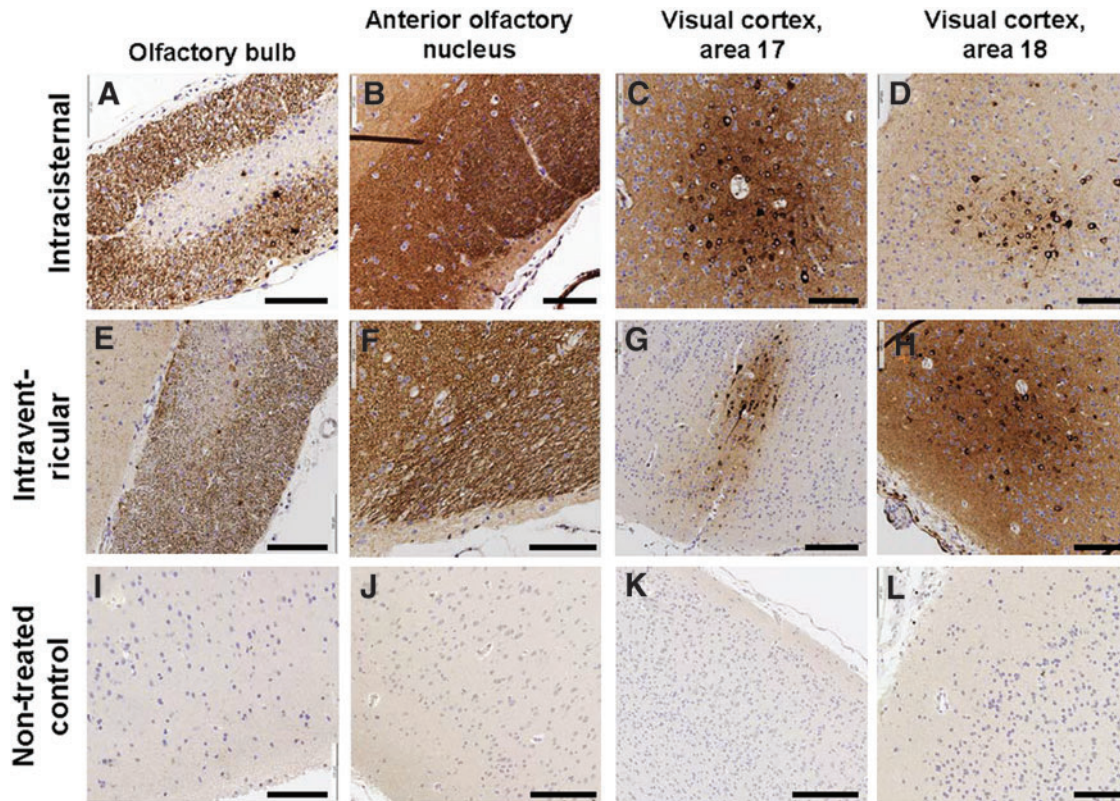

Sections sampled for immunohistochemistry

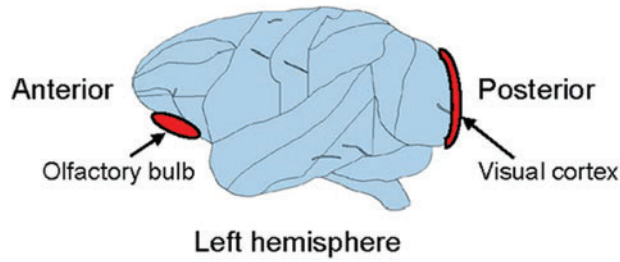

**Supplementary Figure S6.** Additional IHC assessment of expression of ApoE2-HA in the NHP CNS following delivery of AAVrh.10hAPOE2-HA by the intracisternal and intraventricular routes. Shown are additional images displaying expression of ApoE2-HA from the anterior and posterior regions of the CNS, olfactory bulb and visual cortex, respectively. See schematic for sampling sites. (A–D) From intracisternal administered NHP. (E–H) From intraventricular administered NHP. (I–L) From non-treated NHP. (A, E, and I) Olfactory bulb. (B, F, and J) Anterior olfactory nucleus. (C, G, and K) Visual cortex, area 17. (D, H, and L) Visual cortex, area 18. Brain structures identified using Nissl stained coronal brain sections from [brainsmap.org](http://brainsmap.org). Scale bar = 100  $\mu$ m.
