# Supplementary material
Source: PubMed Central journal article supplement (PMC5870071)
Supplement: Supp_Fig7.pdf [file Supp_Fig7.pdf]

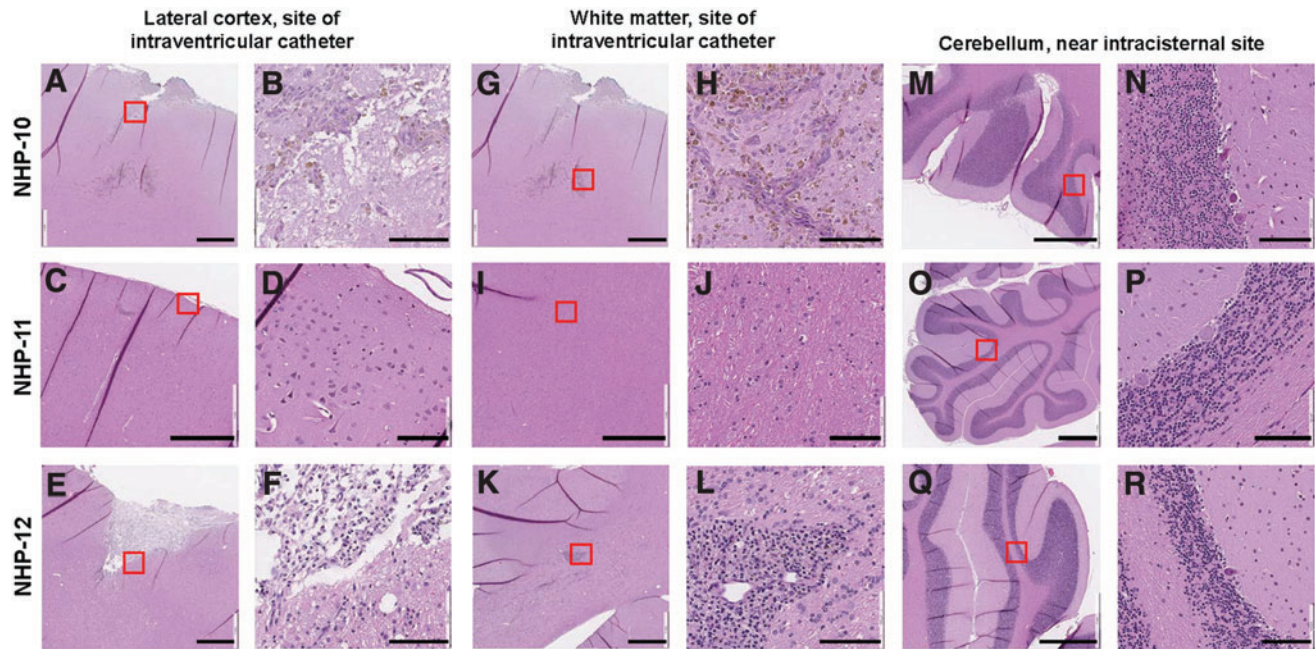

**Sections sampled for H+E stains**

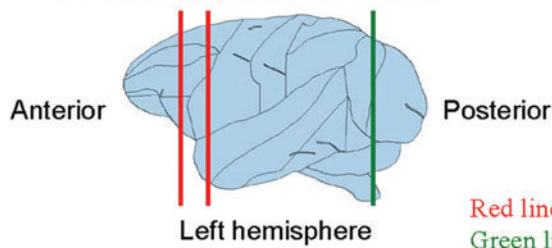

Red lines for ICV catheter (Supplemental Figure 7 – panels A-L);  
Green lines for samples near IC route (Supplemental Figure 7 – panels M-R)

**Supplementary Figure S7.** Histologic safety assessment of NHP CNS in regions adjacent to delivery of AAVrh.10hAPOE2-HA by intraventricular and intracisternal routes. The animals were euthanized at 8 weeks post-vector administration. Left hemispheres were sectioned into 3mm coronal sections following formalin fixation. Histologic staining was performed on brain slices using H&E, with blue indicating nuclei (hematoxylin counterstained). Brown deposits indicate hemosiderin-laden macrophages. Shown are multiple images around the site of the catheter placement in the frontal lobe for dual-route administered NHPs (NHP-10, -11, and -12). Representative images are displayed. **(A-F)** Areas around the catheter insertion in the frontal lobe—lateral outer cortex. **(G-L)** Areas around the catheter insertion in the frontal lobe—medial white matter. **(M-R)** Areas near placement of intracisternal catheter—cerebellum. **(A, C, E, G, I, K, M, O, and Q)** The overall brain parenchyma of the needle tract regions (scale bars=1 mm). **(B, D, F, H, J, L, N, P, and R)** Enlarged areas within the *red boxes* (scale bars=100  $\mu$ m). Approximate locations of the sections of the primate CNS that were sampled for pathology are shown in the schematic, with *color-coded lines* for each section.
