# Supplementary material
Source: PubMed Central journal article supplement (PMC5870071)
Supplement: Supp_Fig9.pdf [file Supp_Fig9.pdf]

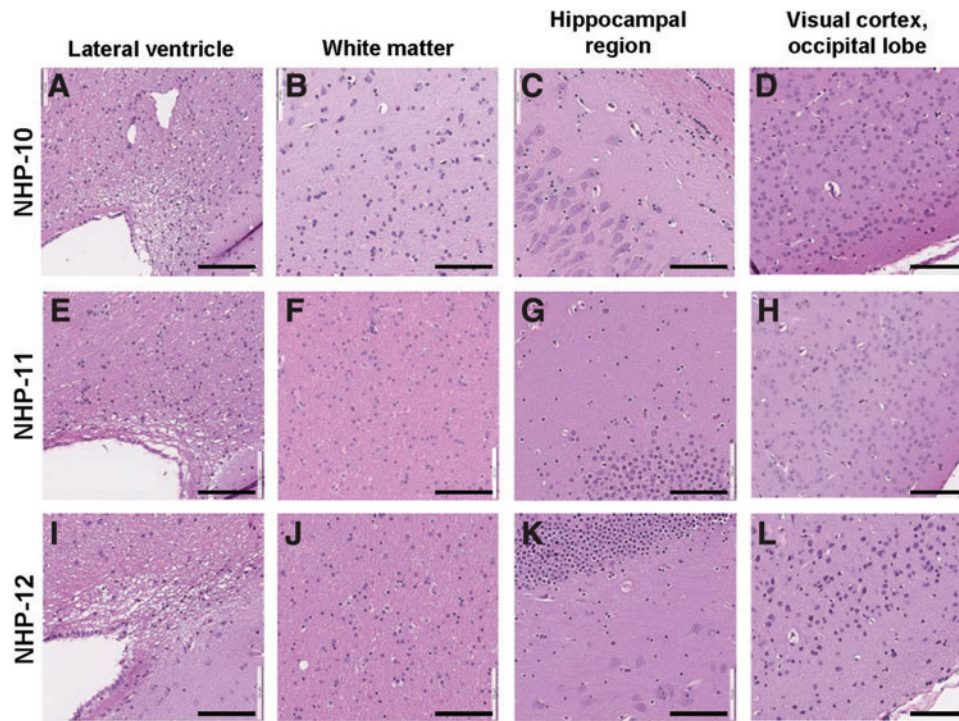

Sections sampled for H+E stains

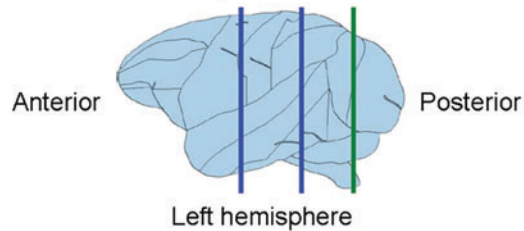

Blue lines for mid brain samples (Supplemental Figure 9 – panels A-C, E-G, I-K);  
 Green lines for samples near IC route (Supplemental Figure 9 – panels D, H, L)

**Supplementary Figure S9.** Histologic safety assessment of regions across the primate CNS following delivery of AAVrh.10hAPOE2-HA by intraventricular and intracisternal routes. Shown are multiple images around the CNS from dual-route administered NHPs (NHP-10, –11, and –12). Representative images are displayed. (A, E, and I) Areas distal to catheter in the frontal lobe—lateral ventricle. (B, F, and J) Areas distal to catheter in the frontal lobe—lateral white matter. (C, G, and K) Hippocampal region. (D, H, and L) Visual cortex, occipital lobe. Scale bars = 100  $\mu$ m, all panels. Approximate locations of the sections of the primate CNS that were sampled for pathology are shown in the schematic, with color-coded lines for each section.
