# Supplementary material
Source: PubMed Central journal article supplement (PMC5870071)
Supplement: Supp_Fig10.pdf [file Supp_Fig10.pdf]

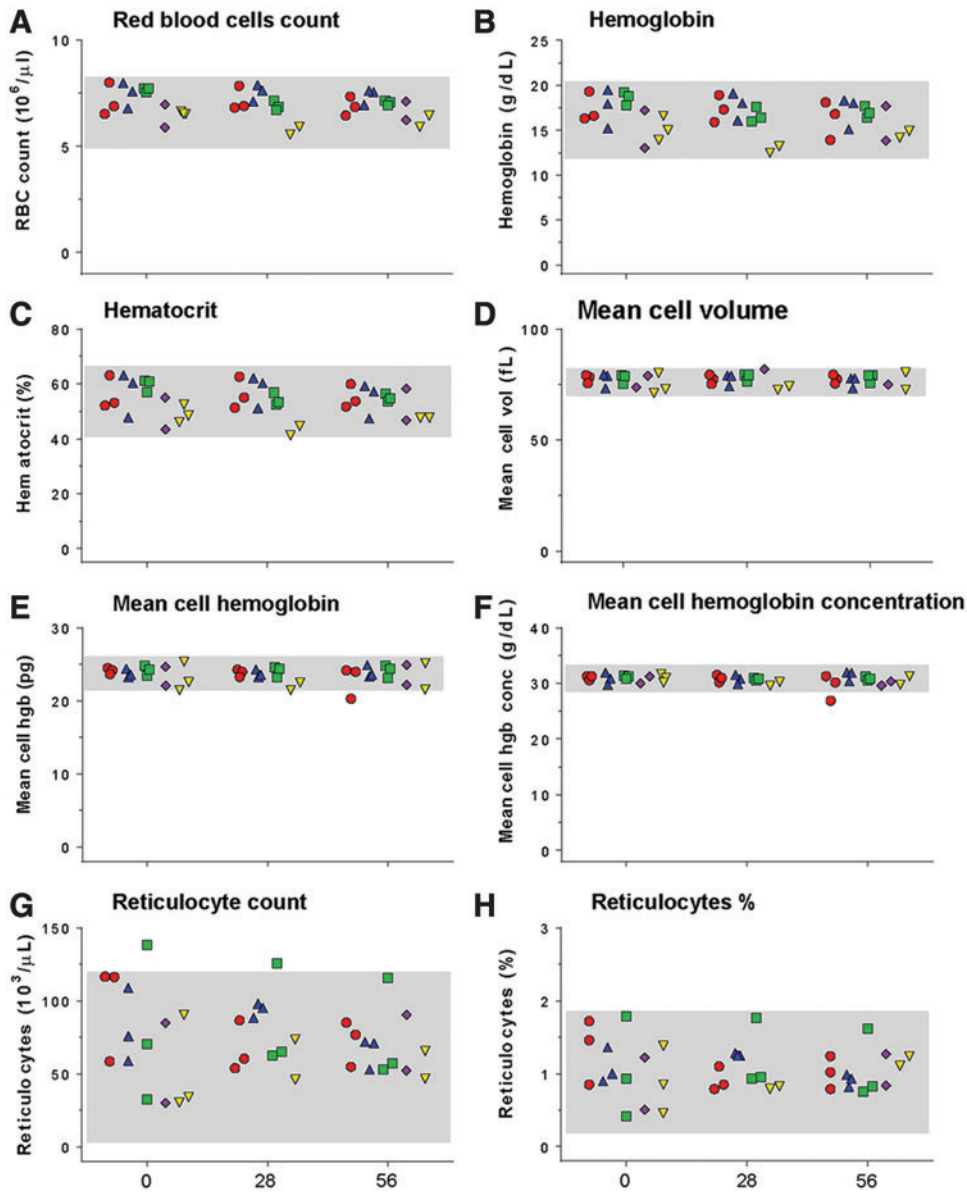

**Supplementary Figure S10.** Hematologic safety assessment of NHPs following CNS administration of AAVrh.10hAPOE2-HA. The animals were assessed for multiple blood parameters at three time points: on the day of administration (day 0), on day 28, and on day 56 prior to necropsy. Times for assessment were  $\pm 2$  days. **(A–T)** Results of 20 complete blood count parameters for each NHP in the study (see Tables 1 and 2), color-coded by treatment (*red circles*, intracisternal route; *blue triangles*, intraventricular route; *green squares*, dual route; *purple diamonds*, intrahippocampal route; and *yellow inverted triangles*, sham or non-treated NHPs). The normal range, shown as the *gray-shaded area*, for each parameter was calculated from historic<sup>31,35</sup> and current African Green monkey studies (total of  $n=29$  individual male NHPs and  $n=65$  blood samples), as the mean  $\pm 2SD$  of each hematologic parameter of monkeys in the studies at the pre-surgery time point (“pre” and day 0, prior to surgery or vector administration). **(A)** Red blood cell (RBC) count. **(B)** Hemoglobin. **(C)** Hematocrit. **(D)** RBC mean cell volume (MCV). **(E)** RBC mean cell hemoglobin (MCH). **(F)** RBC mean cell hemoglobin concentration (MCHC). **(G)** Reticulocyte count. **(H)** Reticulocyte %. **(I)** Platelet count. **(J)** White blood cell (WBC) count. **(K)** Neutrophil count. **(L)** Lymphocyte count. **(M)** Monocyte count. **(N)** Eosinophil count. **(O)** Basophil count. **(P)** Neutrophil %. **(Q)** Lymphocyte %. **(R)** Monocyte %. **(S)** Eosinophil %. **(T)** Basophil %.

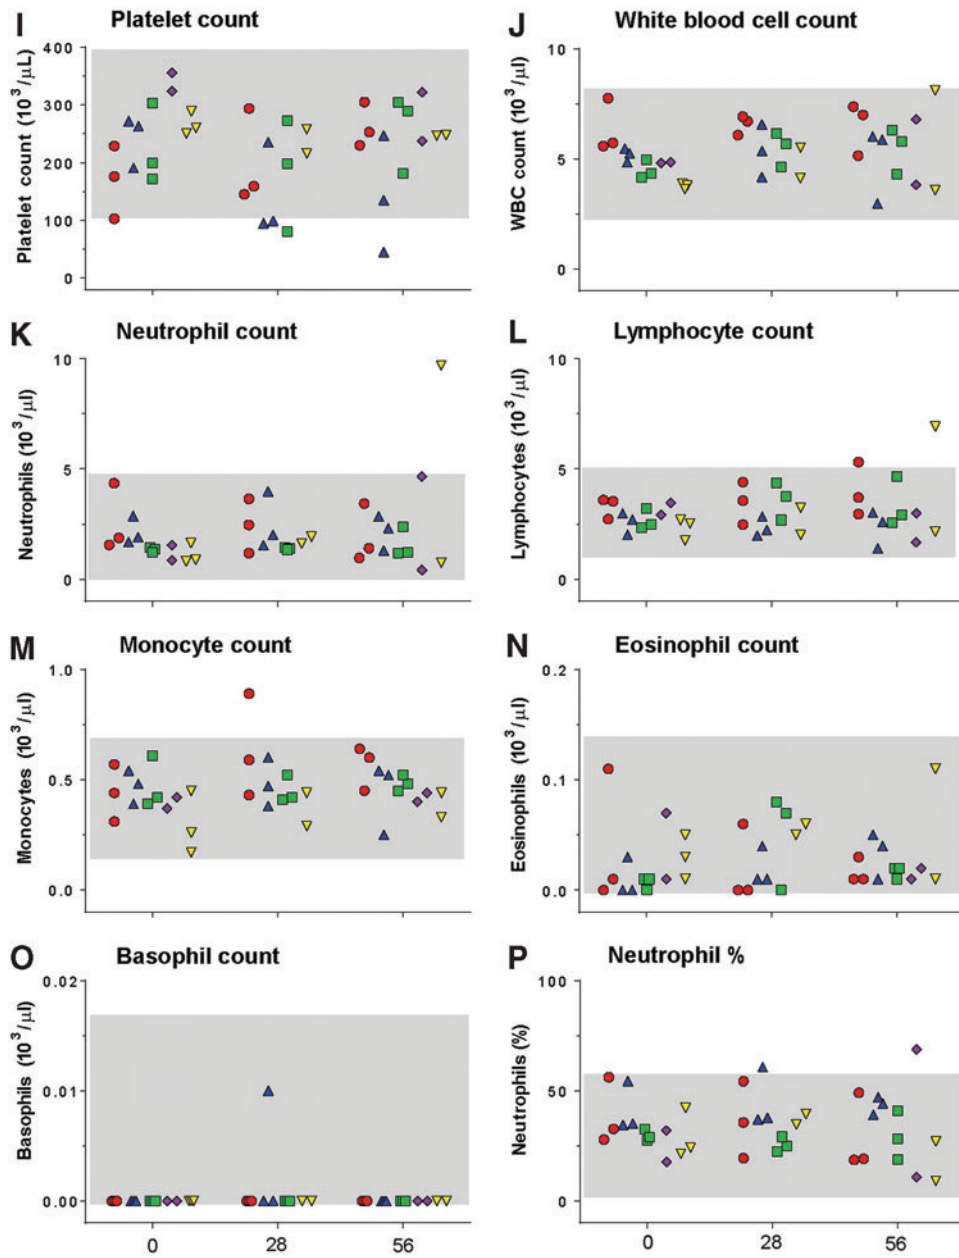

Supplementary Figure S10. (Continued).

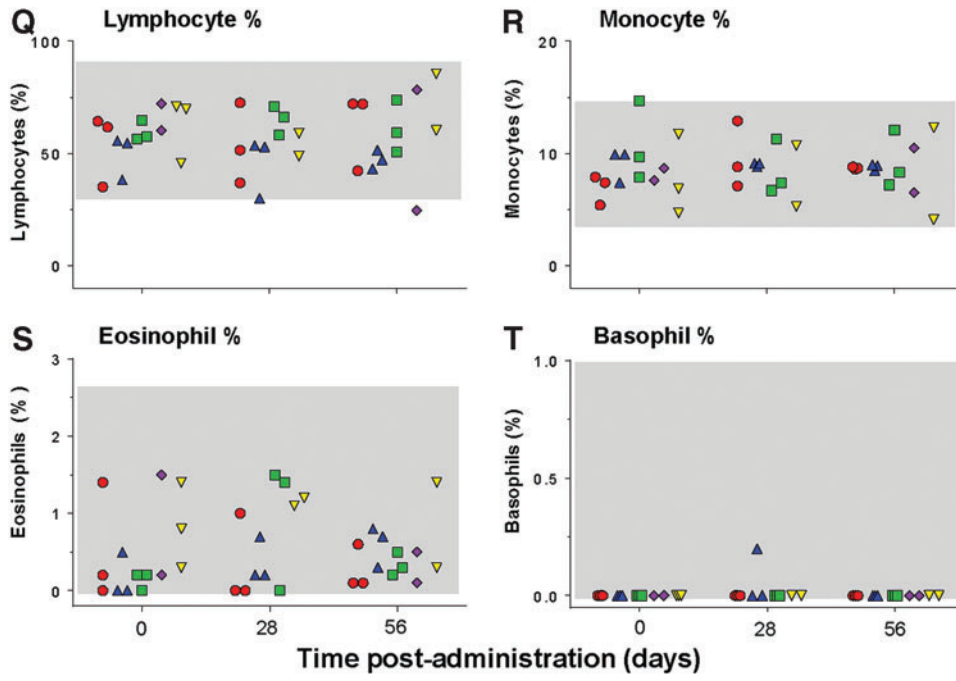

Supplementary Figure S10. (Continued).

---
