# Supplementary material
Source: PubMed Central journal article supplement (PMC5870071)
Supplement: Supp_Fig11.pdf [file Supp_Fig11.pdf]

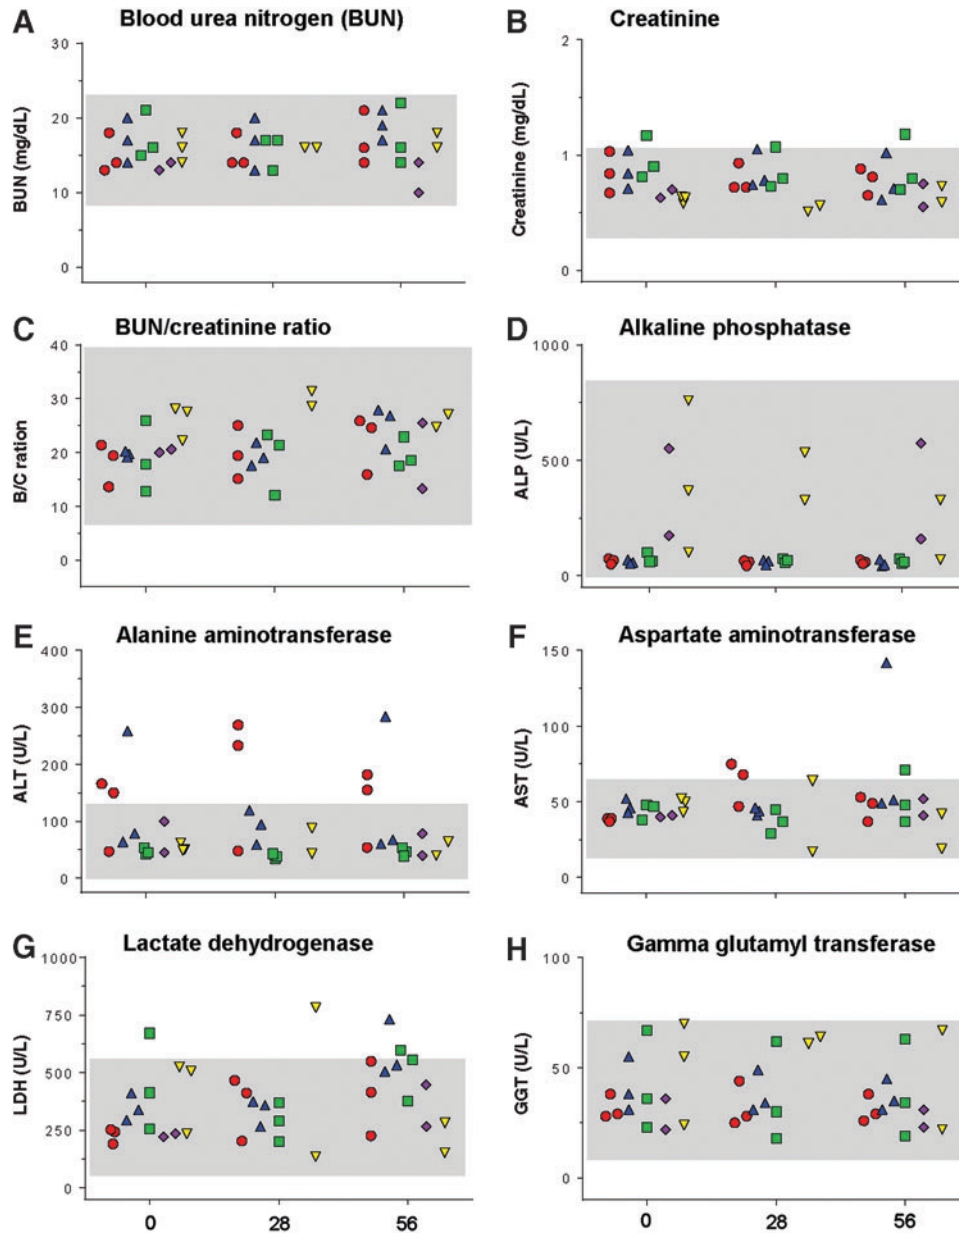

**Supplementary Figure S11.** Serum chemistry safety assessment of NHP following CNS administration of AAVrh.10hAPOE2-HA. The NHP were sedated for blood samples with assessment of serum chemistries at three time points: on the day of administration (day 0), on day 28, and on day 56, prior to necropsy. Times for assessment were  $\pm 2$  days. **(A–DD)** Results of 30 serum chemistry parameters for each animal in the study (see Tables 1 and 221), color-coded by treatment (*red circles*, intracisternal route; *blue triangles*, intraventricular route; *green squares*, dual route; *purple diamonds*, intrahippocampal route; and *yellow inverted triangles*, sham or non-treated NHPs). The normal range, shown as the *gray-shaded area*, for each parameter was calculated from historic<sup>31,35</sup> and current African Green monkey studies (total of  $n=29$  individual male NHPs and  $n=65$  blood samples), as the  $\text{mean} \pm 2SD$  of each serum parameter of monkeys in the studies at the presurgical time point (“pre” and day 0, prior to surgery or vector administration). **(A)** Blood urea nitrogen (BUN). **(B)** Creatinine. **(C)** BUN/creatinine ratio. **(D)** Alkaline phosphatase (ALP). **(E)** Alanine aminotransferase (ALT). **(F)** Aspartate aminotransferase (AST). **(G)** Lactate dehydrogenase (LDH). **(H)** Gamma glutamyl transferase (GGT). **(I)** Total bilirubin. **(J)** Direct bilirubin. **(K)** Indirect bilirubin. **(L)** Total protein. **(M)** Albumin. **(N)** Globulin. **(O)** Albumin/globulin ratio. **(P)** Phosphorus. **(Q)** Calcium. **(R)** Glucose. **(S)** Cholesterol. **(T)** Triglyceride. **(U)** Creatine kinase. **(V)** Total bicarbonate. **(W)** Amylase. **(X)** Lipase. **(Y)** Magnesium. **(Z)** Sodium. **(AA)** Potassium. **(BB)** Chloride. **(CC)** Sodium/potassium ratio. **(DD)** Anion gap.

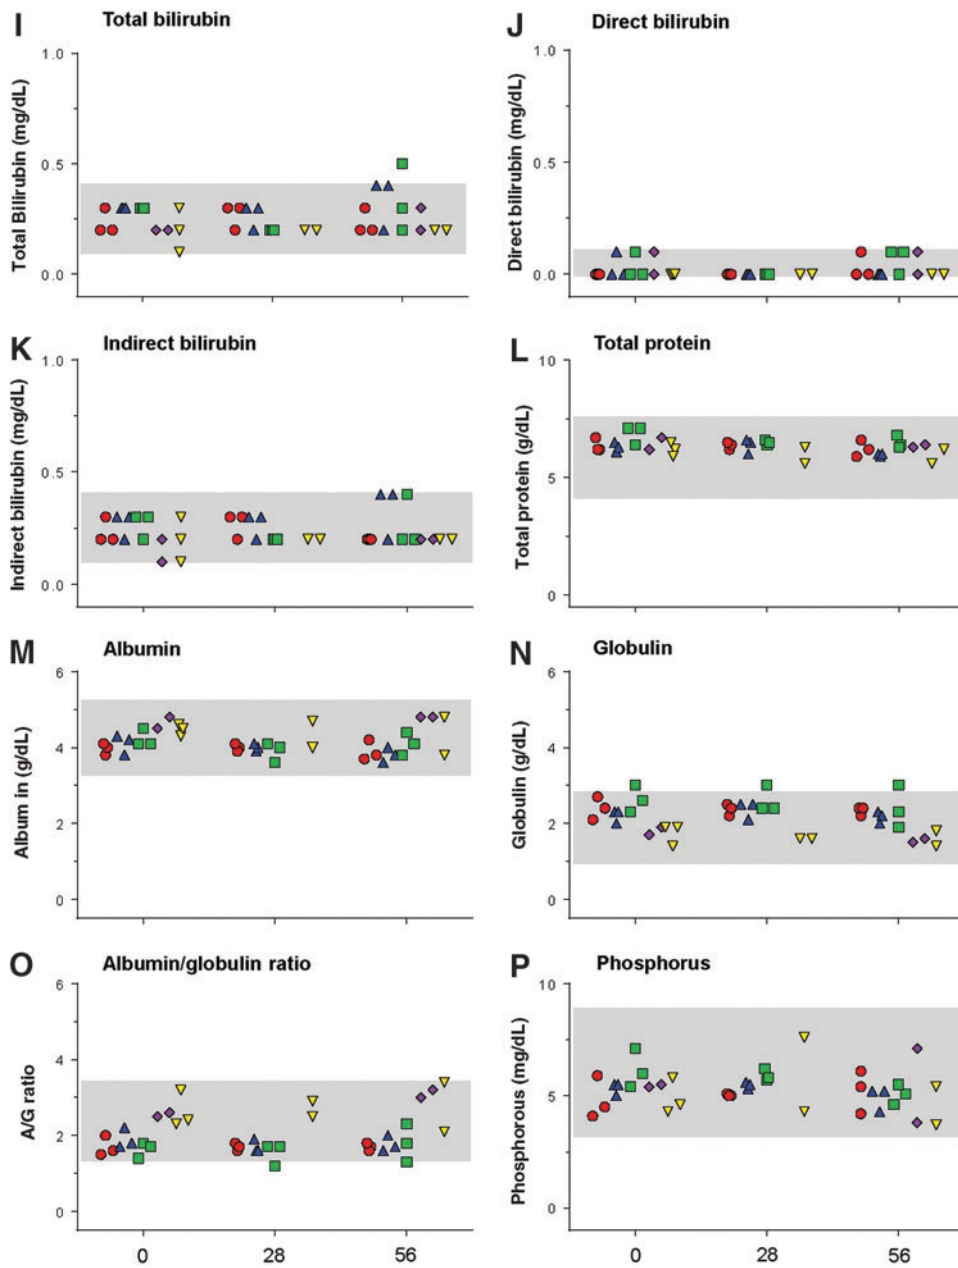

Supplementary Figure S11. (Continued).

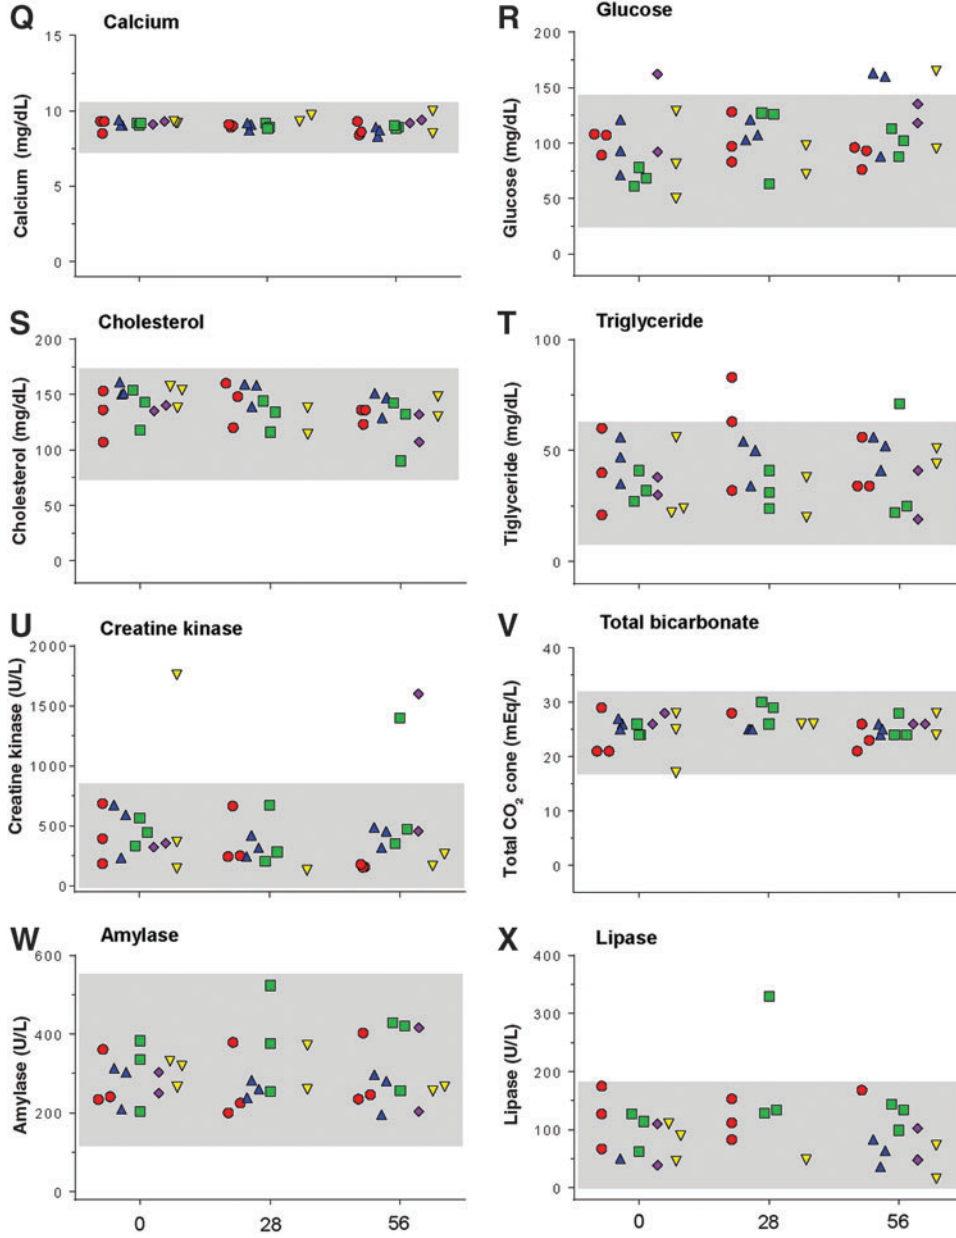

Supplementary Figure S11. (Continued).

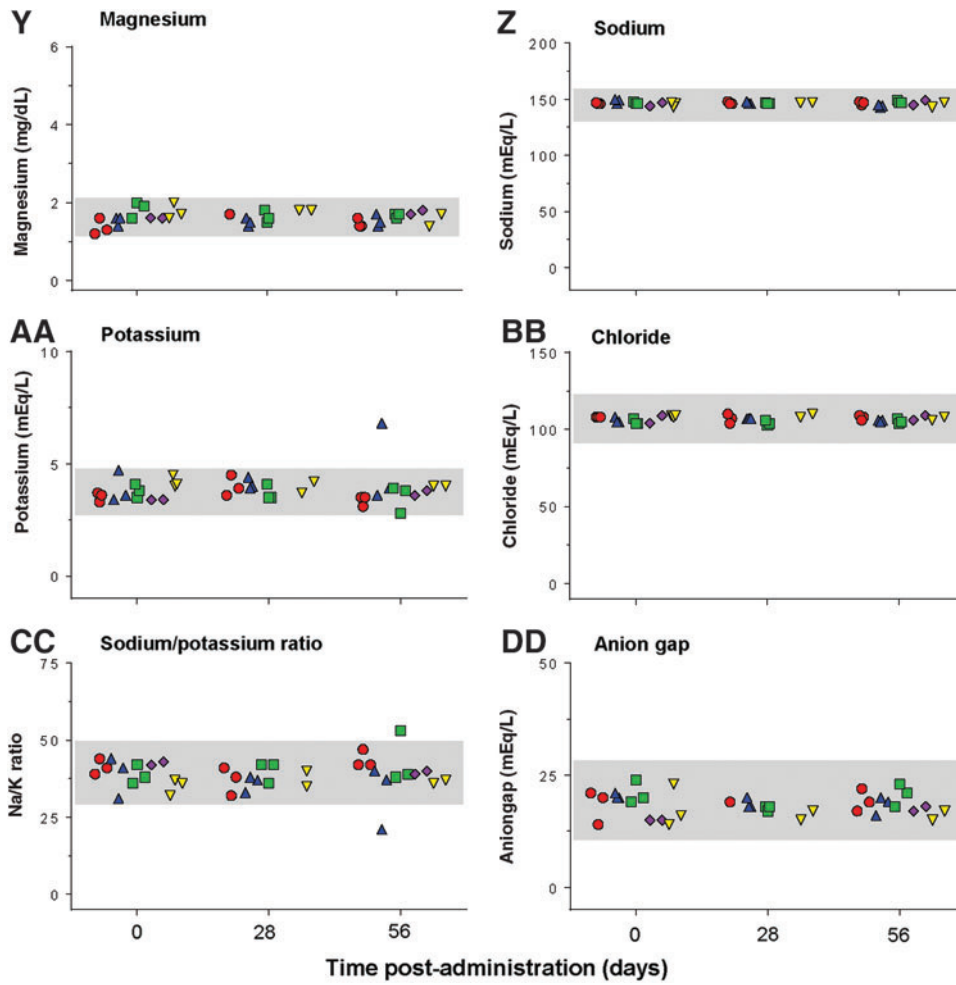

Supplementary Figure S11. (Continued).
