# Supplementary material
Source: PubMed Central journal article supplement (PMC5870071)
Supplement: Supp_Table1.pdf [file Supp_Table1.pdf]

## Supplementary Data

**Supplementary Table S1.** *Quantitative assessment of NHP behavior following vector administration<sup>a,b</sup>*

| <i>Behavior scoring</i>             |            | <i>Observed behaviors scored in each category</i>                                                                                                                             |
|-------------------------------------|------------|-------------------------------------------------------------------------------------------------------------------------------------------------------------------------------|
| Anxiety score <sup>c</sup>          | } Healthy  | Chewing, penile erection, scratching, yawning, threaten outside<br>Bipedal lookout, shift, tail flag, vertical climb, vocalization<br>Cage pick, self-groom, eating, drinking |
| Arousal score <sup>c</sup>          |            |                                                                                                                                                                               |
| Quiet behaviors score <sup>c</sup>  |            |                                                                                                                                                                               |
| Sedation score <sup>d</sup>         | } Abnormal | Eyes closed, freeze (motionless), face down<br>Stereotypy, dyskinesia, dystonia                                                                                               |
| Abnormal motions score <sup>d</sup> |            |                                                                                                                                                                               |

<sup>a</sup>Behavioral assessments were done pre-vector administration and on days 0, 28, and 56 post-vector administration.

<sup>b</sup>Specific NHP behavior (normal referred to as healthy and abnormal) described in this table was visually assessed by two observers blinded to treatment and vector administration route from the videotape sessions of primates in individual home cages in the absence of stimuli. The primates were given a score of "1" for 5 s of each specific healthy (normal) and abnormal behavior. The totals for each behavior were determined for 3 min assessment session, and assigned into the anxiety, arousal, quiet behavior, sedation, and abnormal motion categories as described above.

<sup>c</sup>The sum of normal typical primate behaviors (anxiety, arousal, and quiet behaviors) was calculated as the "healthy" score for each session.

<sup>d</sup>The sum of abnormal behaviors (sedation and abnormal motions) was calculated as the "abnormal" score for each session.
